# Supplementary material for: 8 Å structure of the outer rings of the Xenopus laevis nuclear pore complex obtained by cryo-EM and AI
Source: PubMed Central journal article supplement (PMC9233733; doi:10.1007/s13238-021-00895-y), 2022-01-11
Supplement: 13238_2021_895_MOESM5_ESM.pdf [file 13238_2021_895_MOESM5_ESM.pdf]

## Supplementary figures and tables

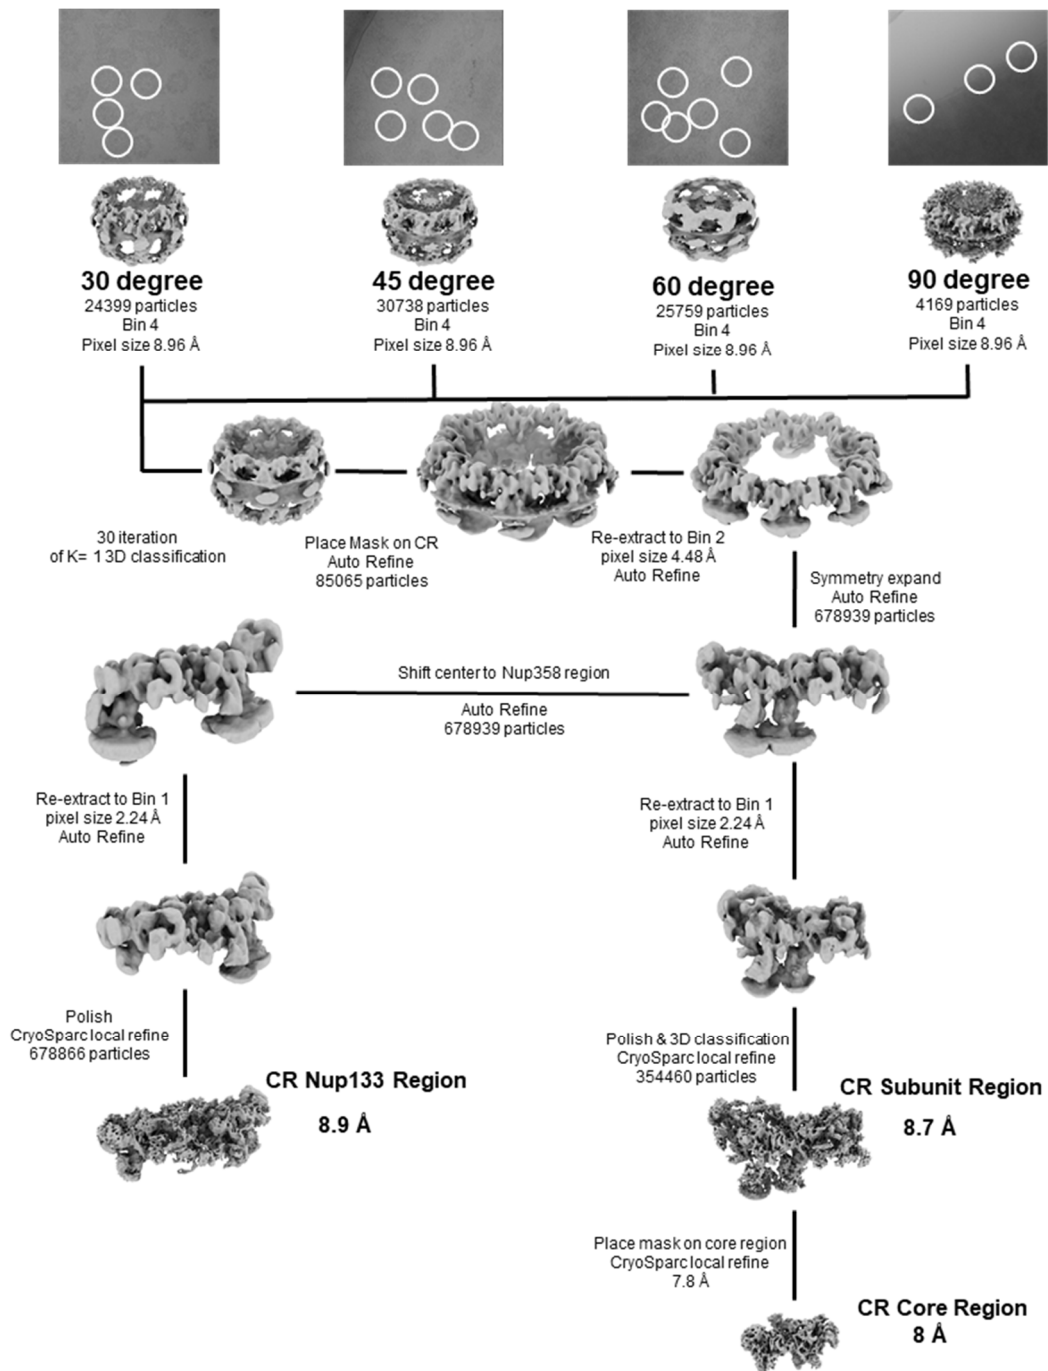

Figure S1. Data processing workflow of the CR from the *X. laevis* oocyte NPC.

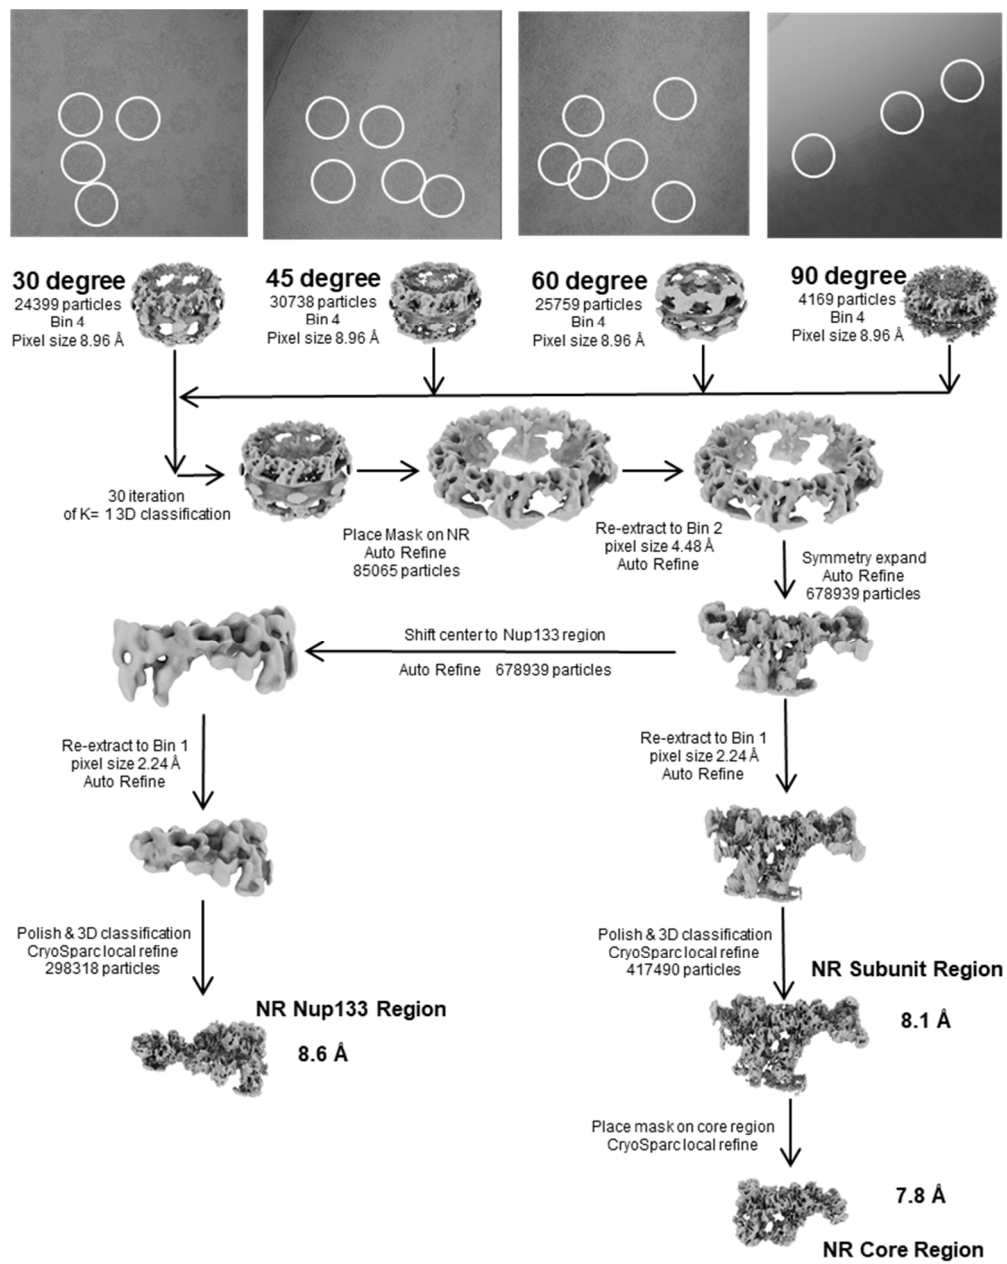

**Figure S2. Data processing workflow of the NR from the *X. laevis* oocyte NPC.**

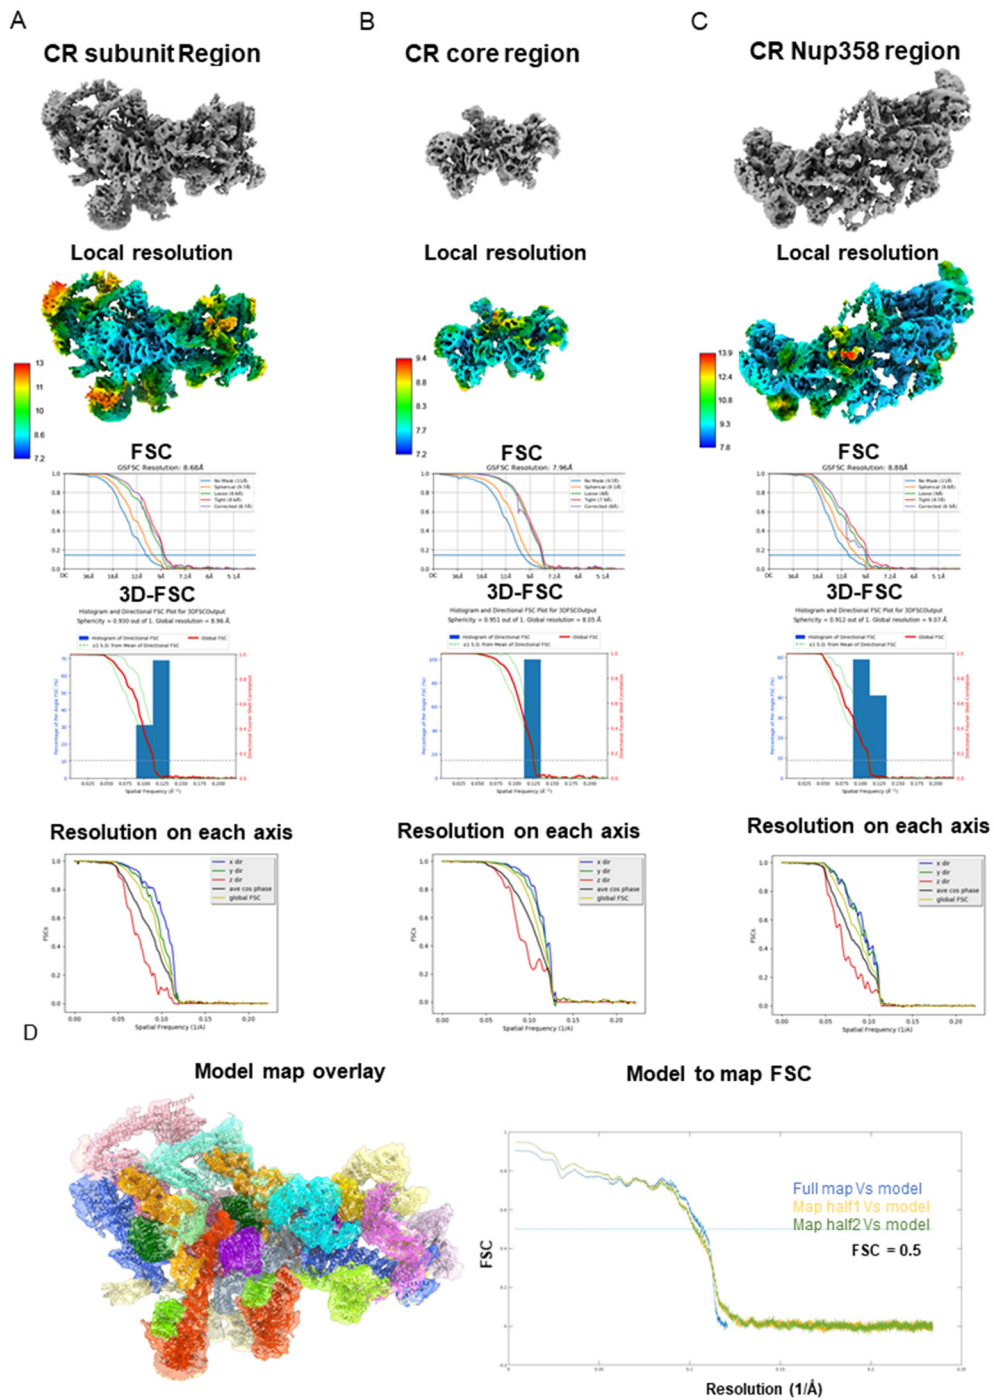

**Figure S3. Assessments of cryo-EM maps of the CR subunit.** (A, B, C) Map display, local resolution estimation, FSC, 3D-FSC and directional FSC of the CR subunit region, CR core region and CR Nup358 region. (D) Map model overlay of the CR subunit, and map versus model FSC estimation.

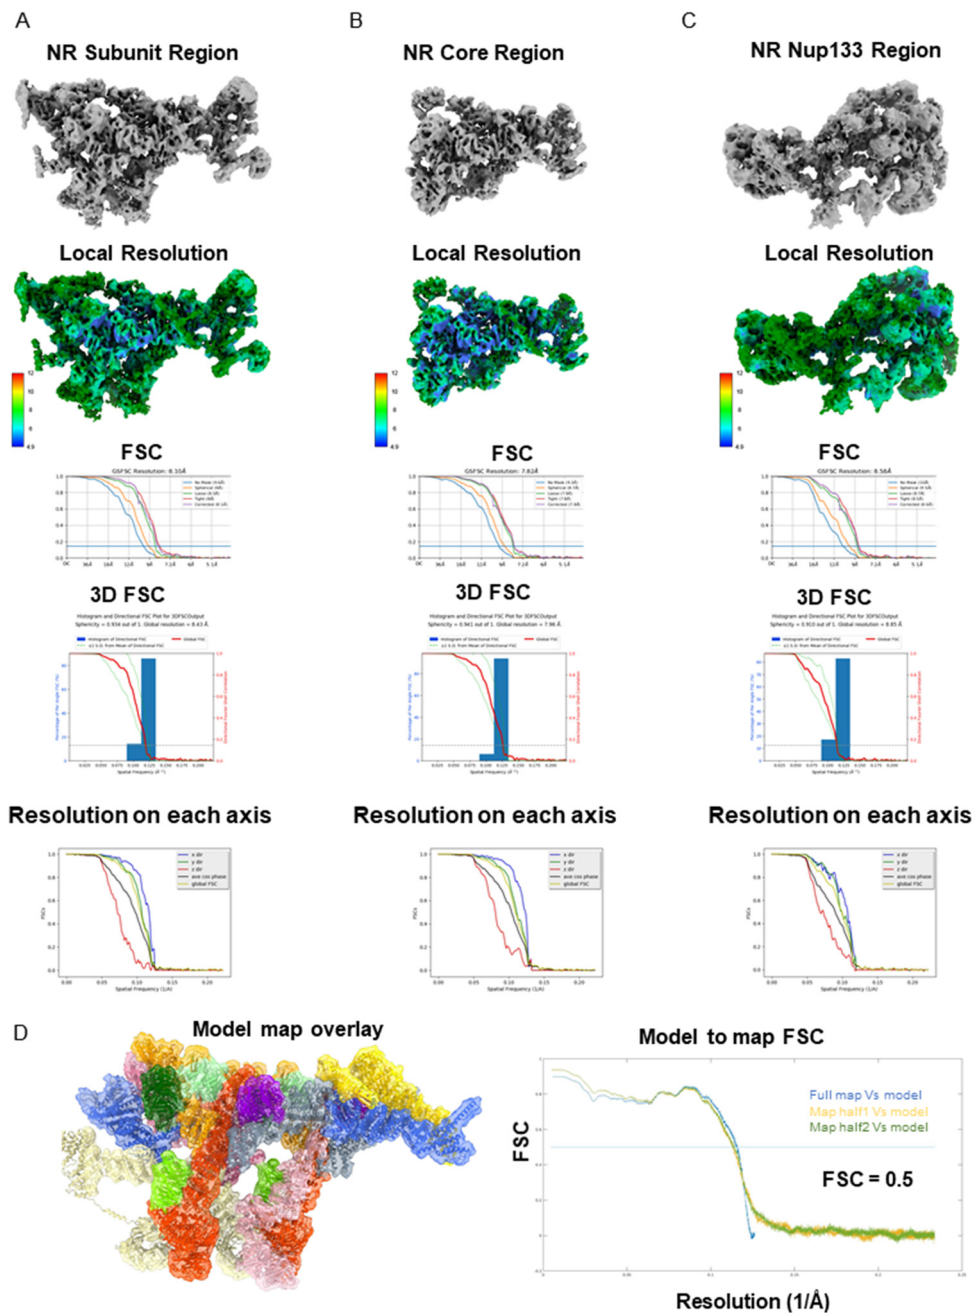

**Figure S4. Assessments of cryo-EM maps of the NR subunit. (A, B, C)** Map display, local resolution estimation, FSC, 3D-FSC and directional FSC of the NR subunit region, NR core region and NR Nup133 region. **(D)** Map model overlay of the NR asymmetric unit, and map versus model FSC estimation.



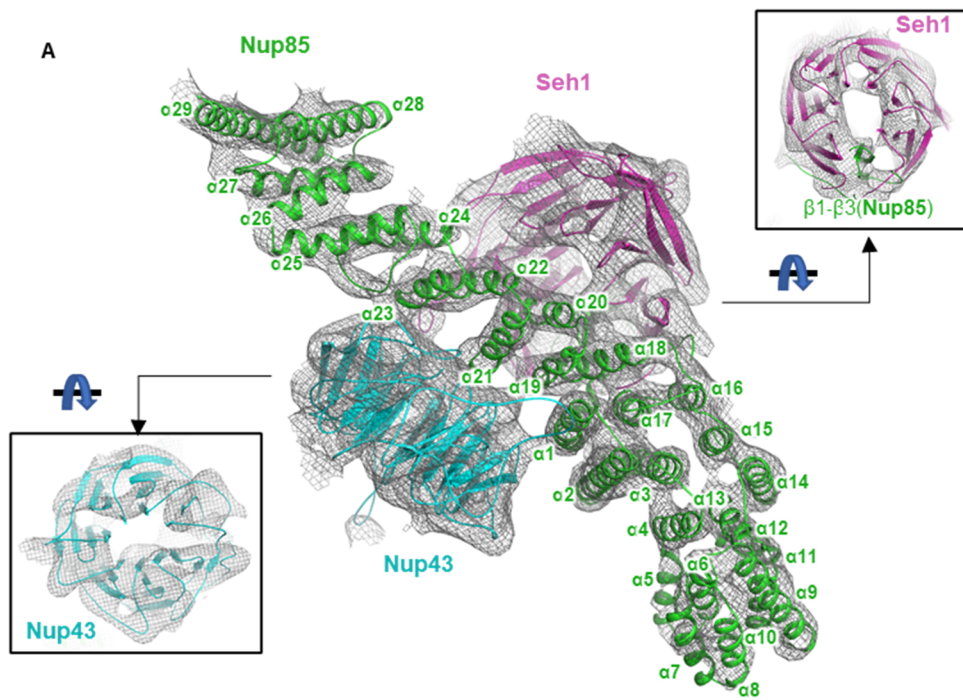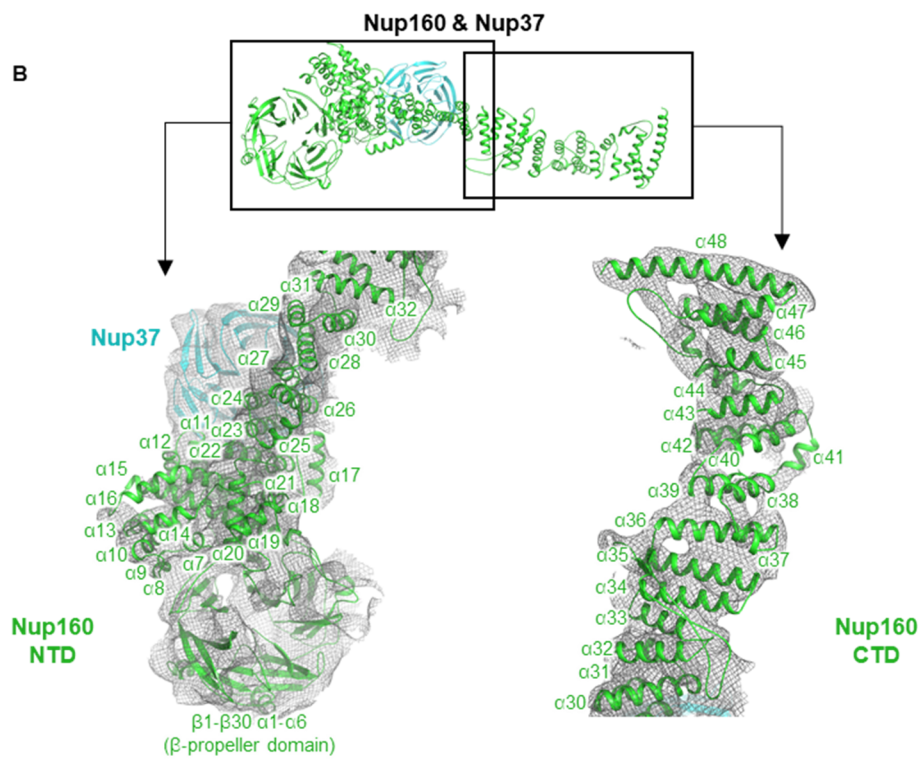

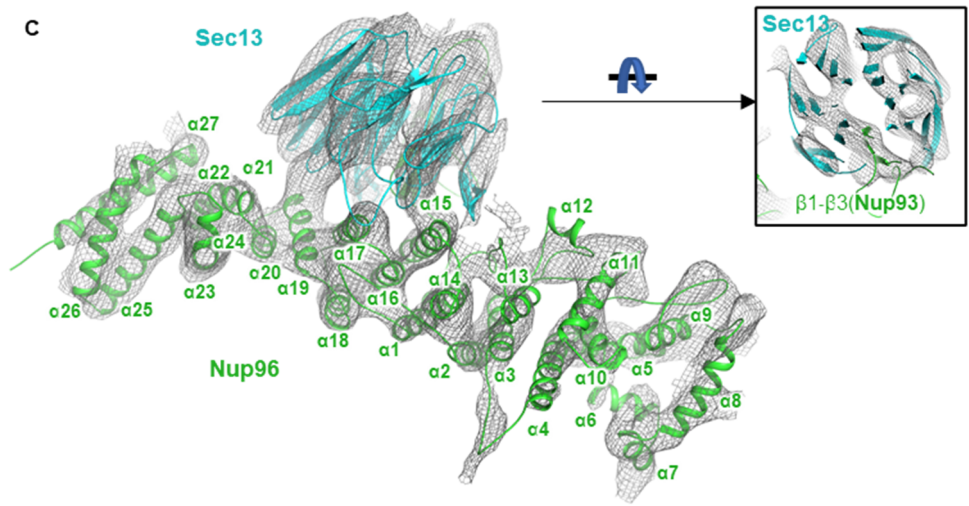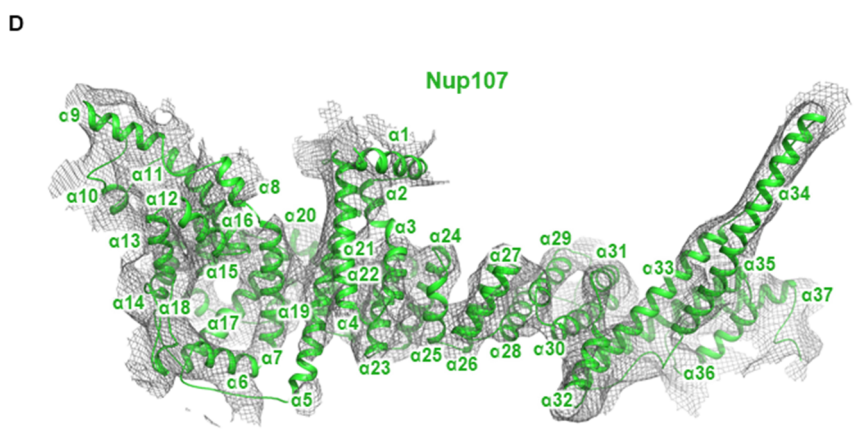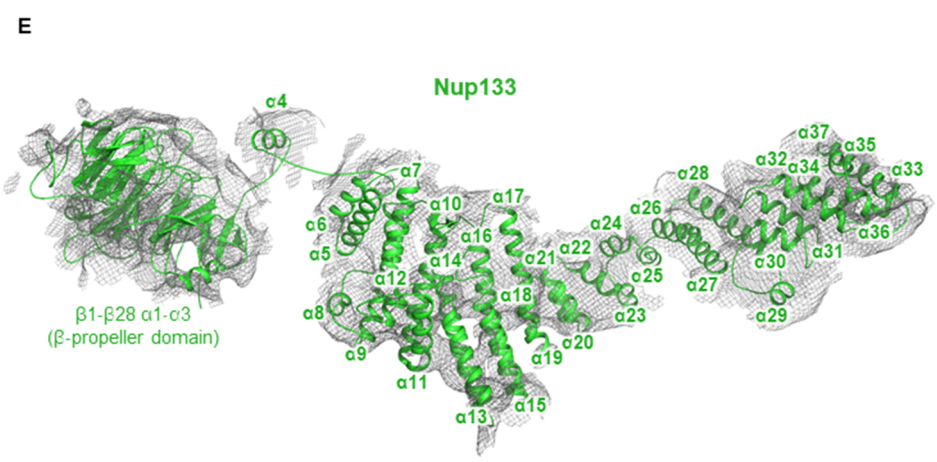

F

Inner Nup205

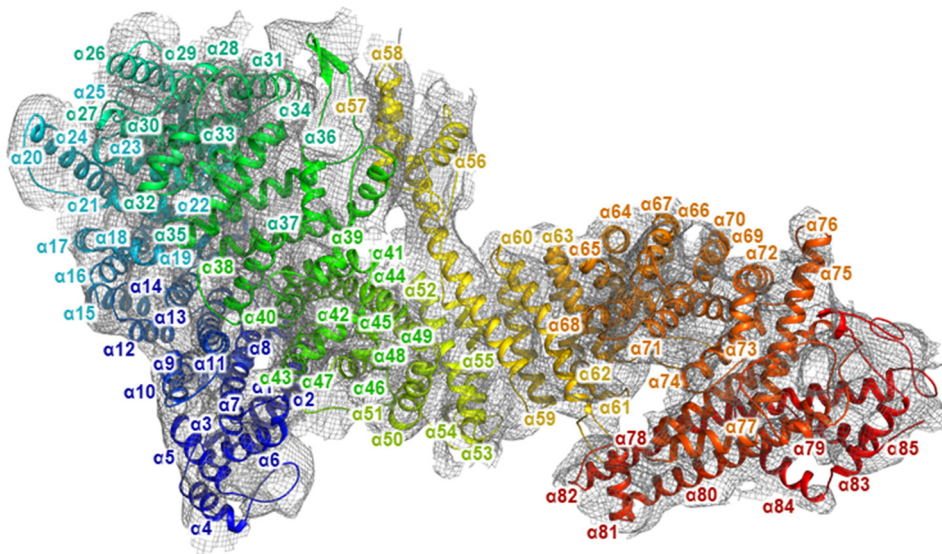

G

Outer Nup205

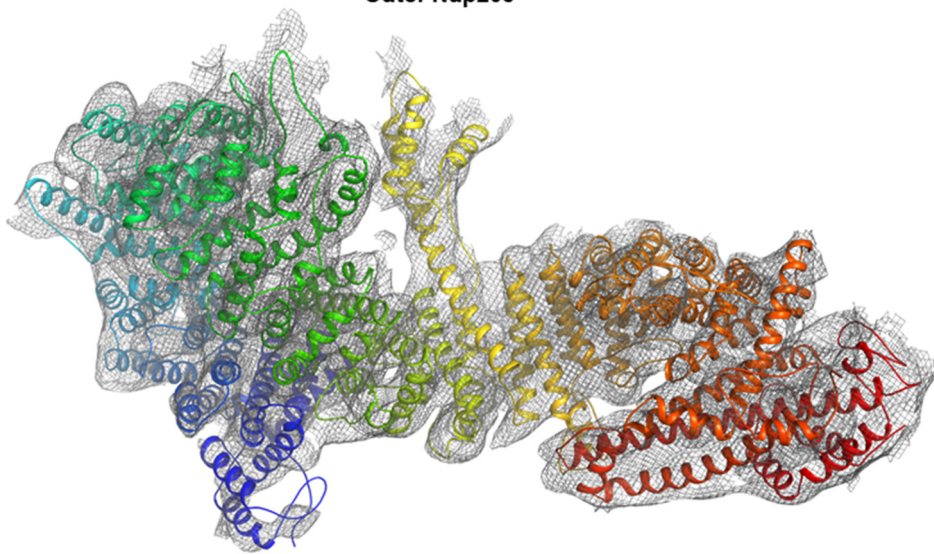



H

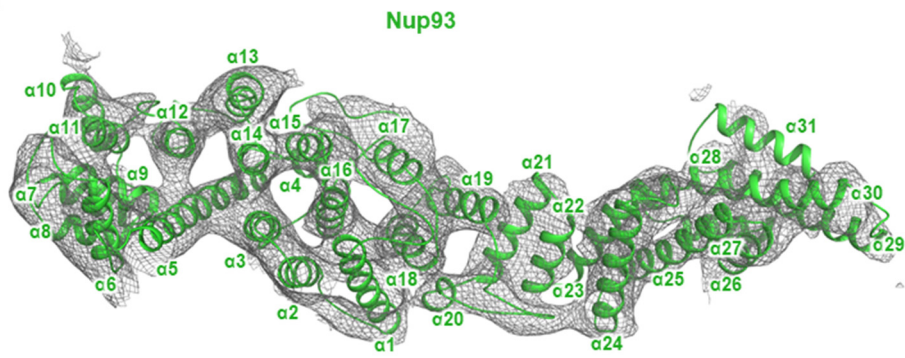

I

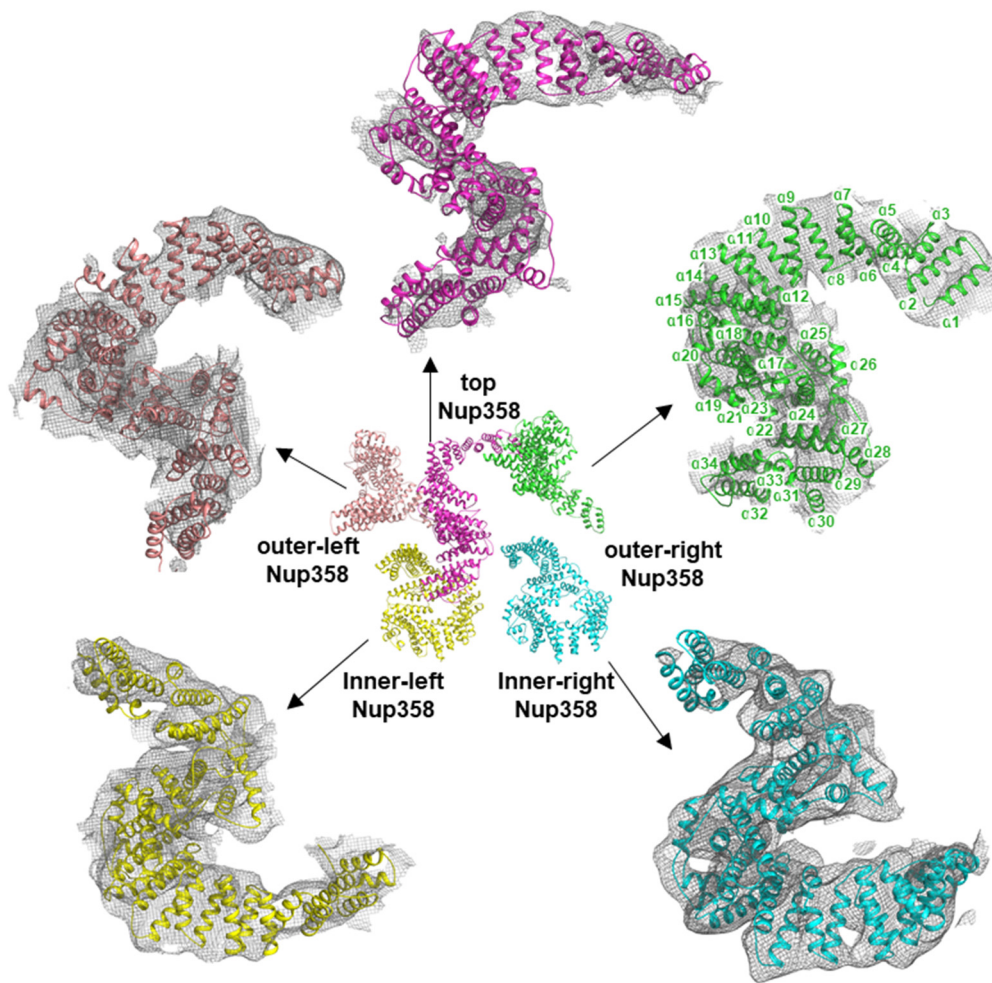

J

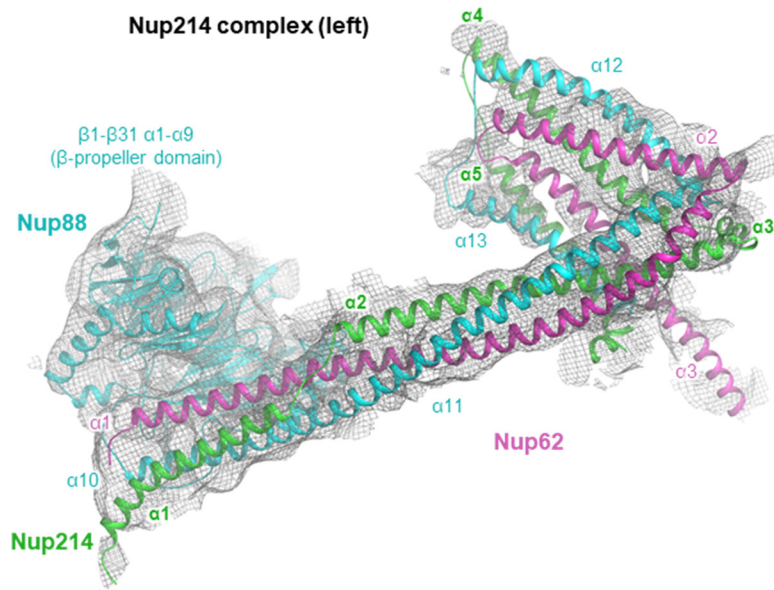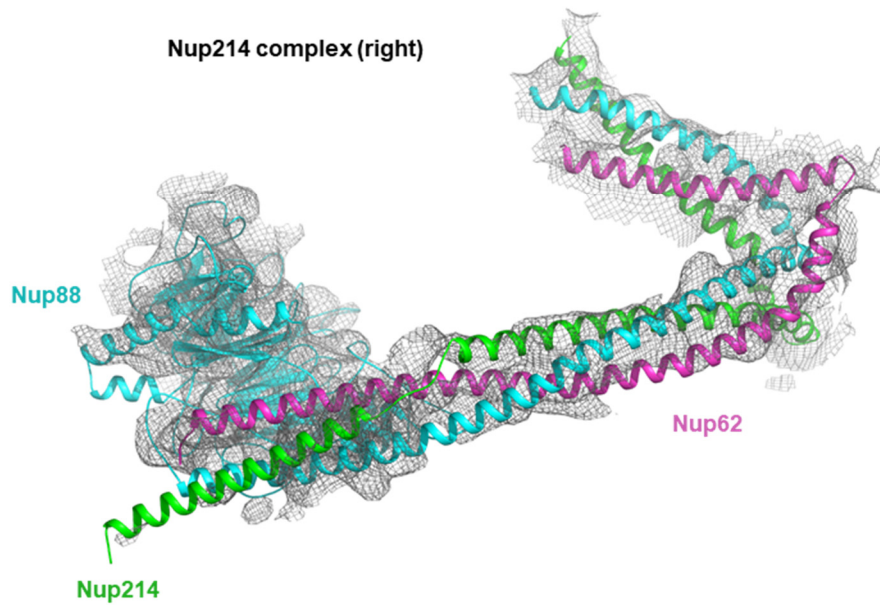

**Figure S5. Model building quality and secondary structure assignment of the CR subunit. (A-J)** Model building quality of Nup85, Seh1, Nup43, Nup160, Nup37, Sec13, Nup96, Nup107, Nup133, Nup205, Nup93, Nup358 and Nup214 complexes.

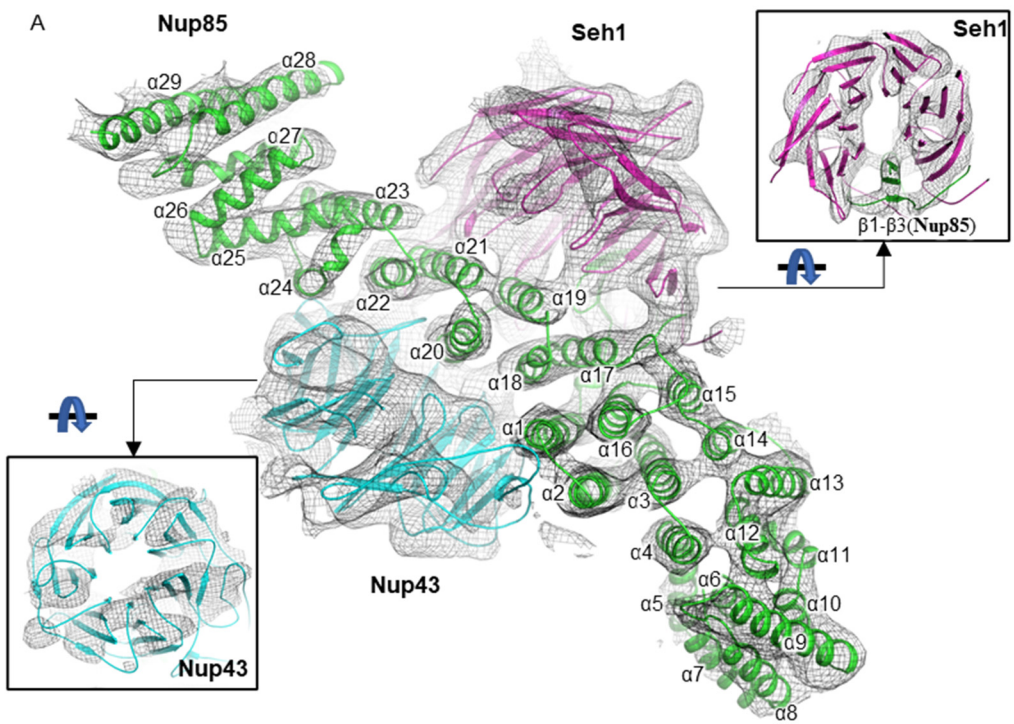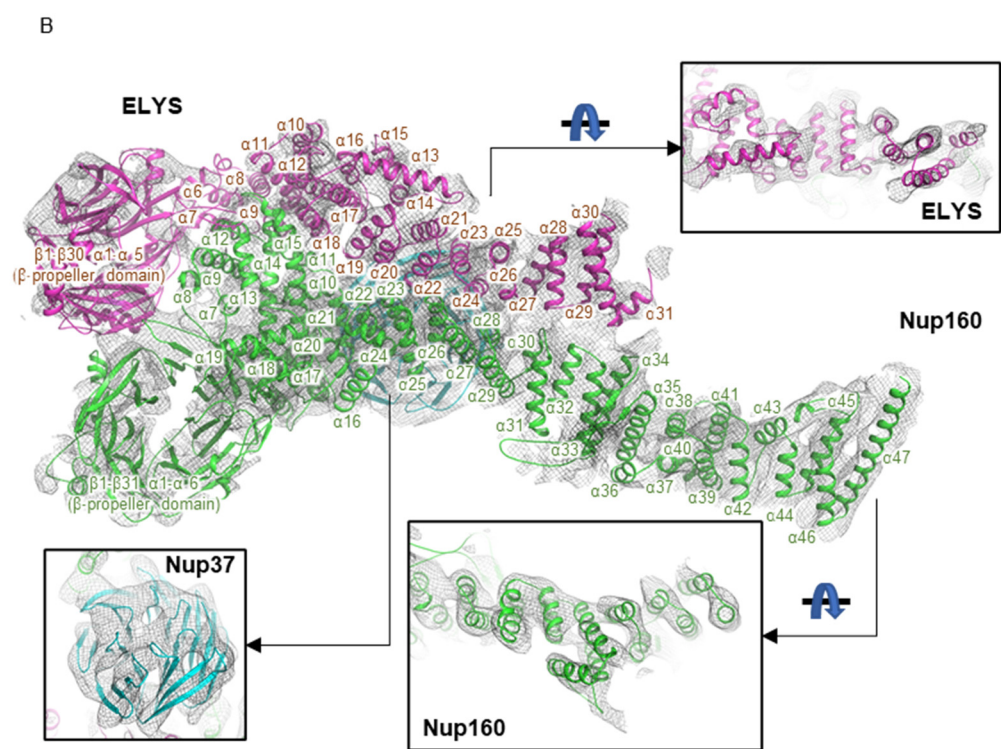



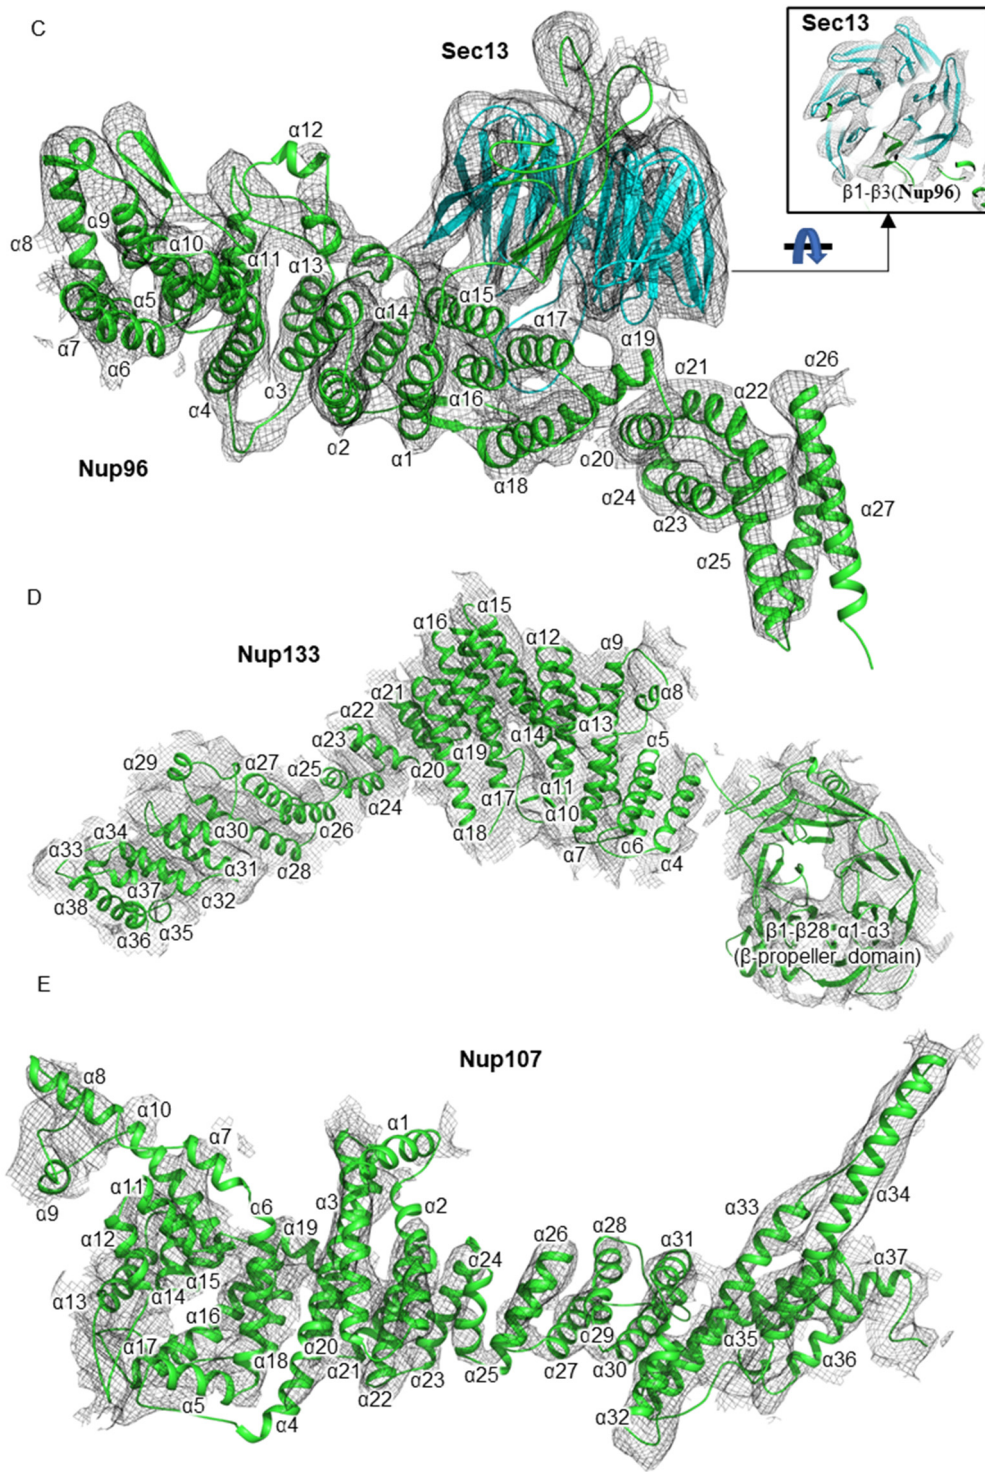



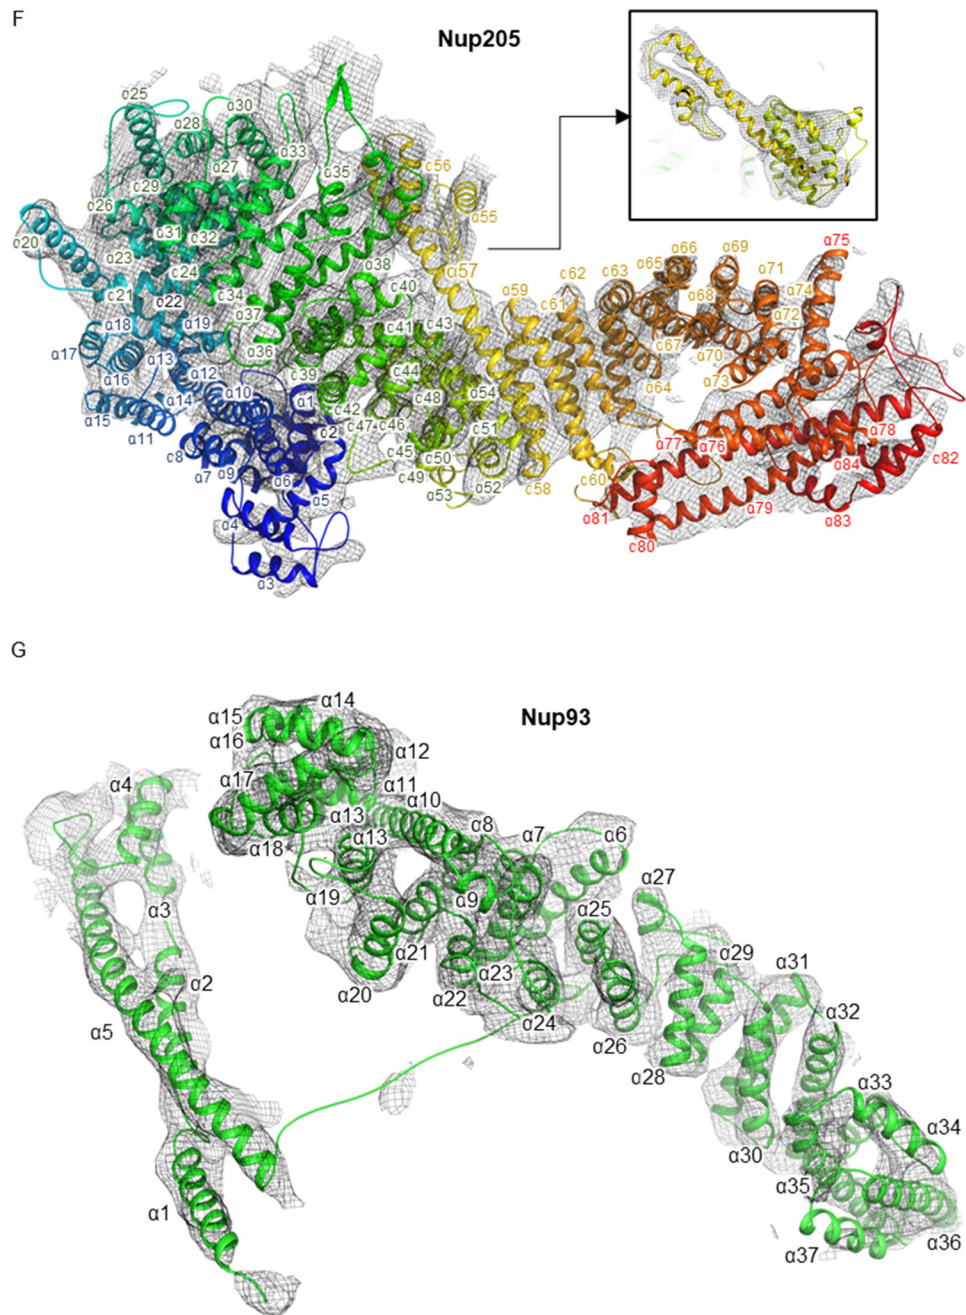

**Figure S6. Model building quality and secondary structure assignment of the NR asymmetric unit. (A-G) Model building quality of Nup85, Seh1, Nup43, ELYS, Nup160, Sec13, Nup96, Nup133, Nup107, Nup205 and Nup93.**

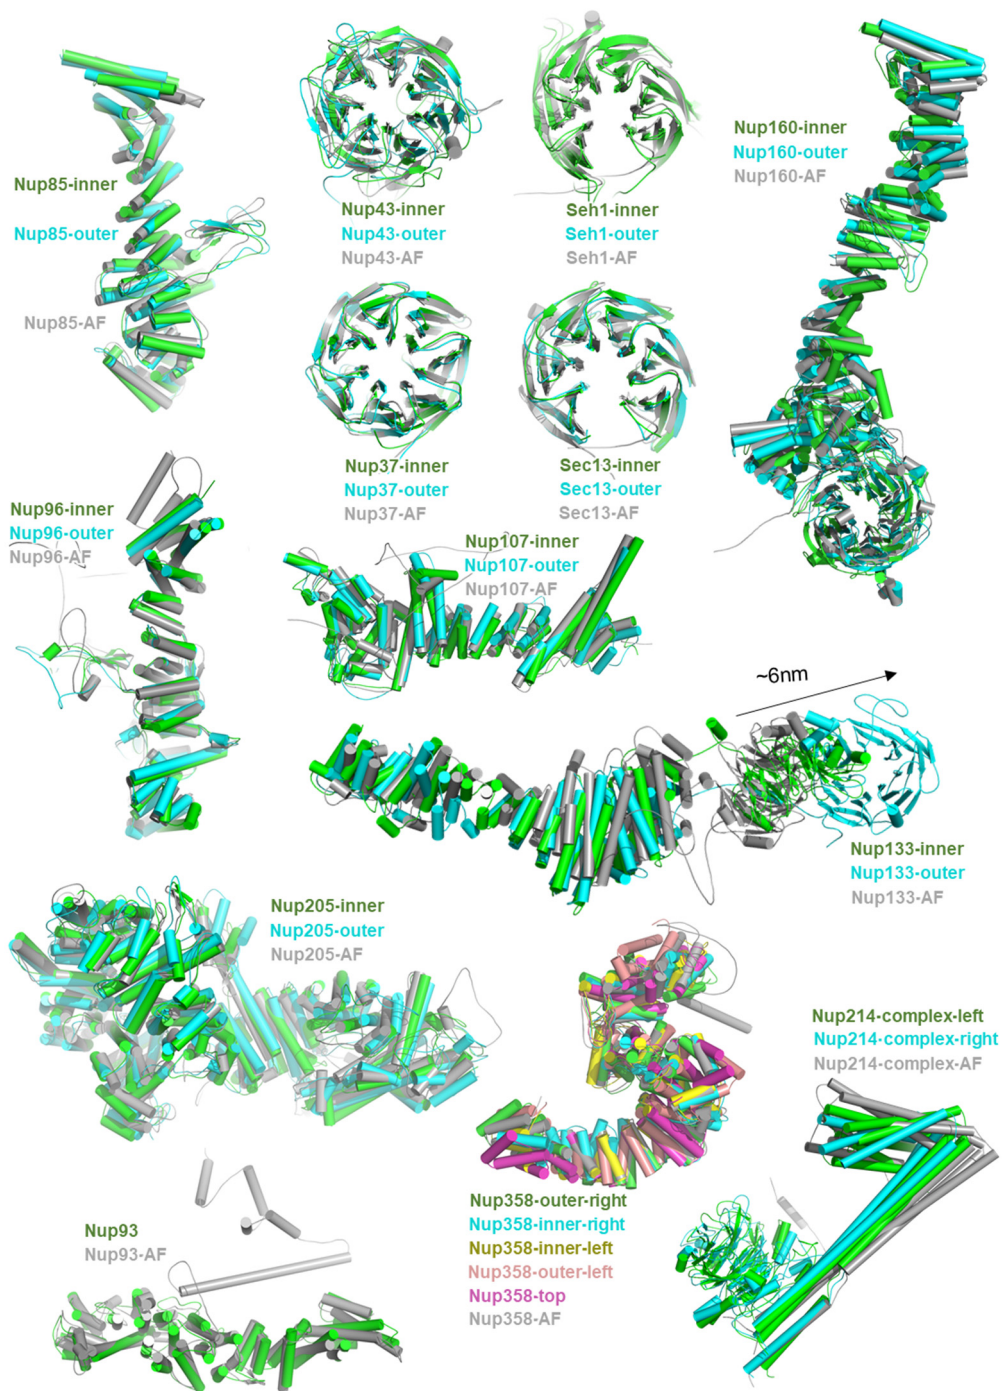

**Figure S7. Comparisons of the refined structure and predicted structure by AlphaFold2 (AF) of CR Nups from the *X. laevis* NPC.**

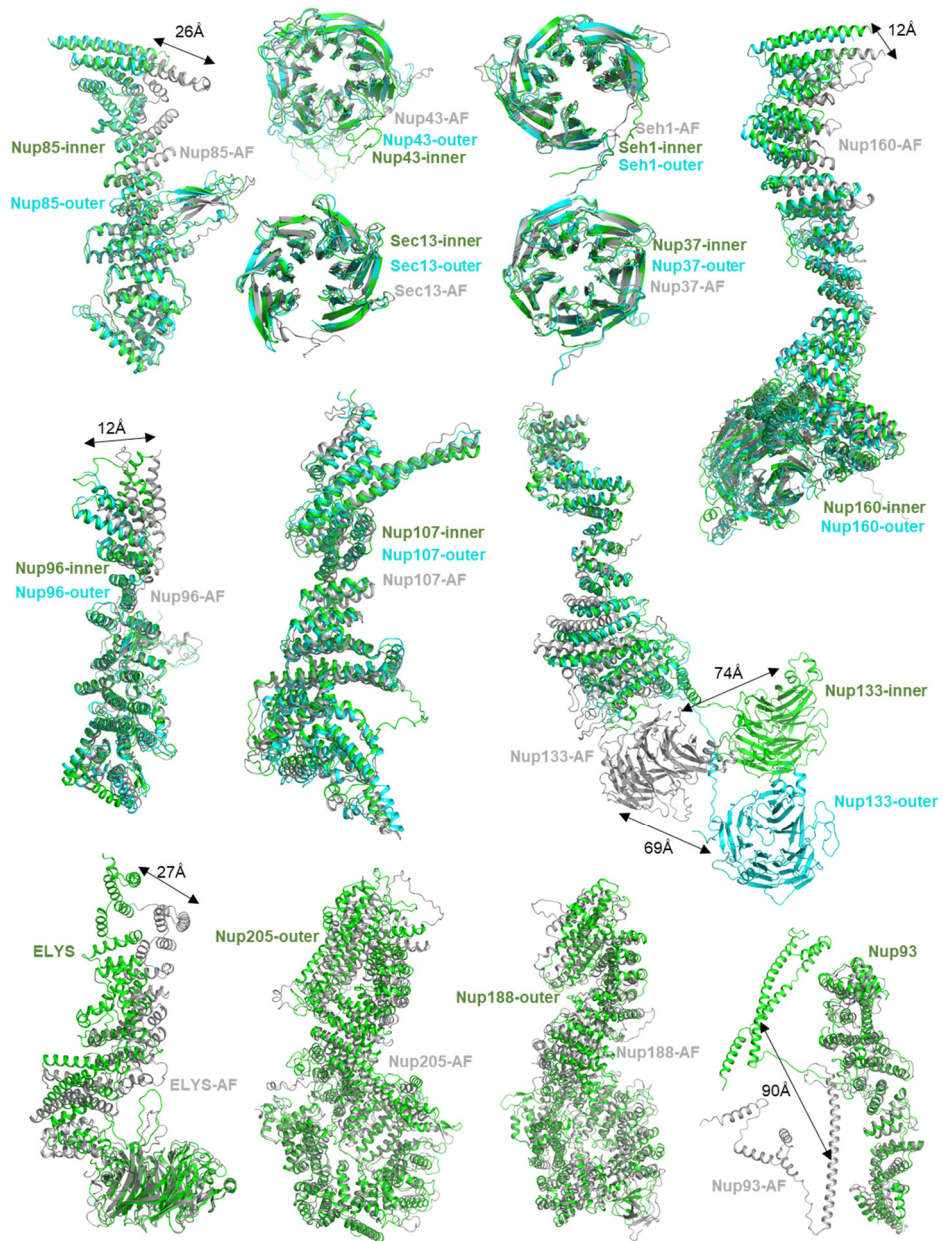

**Figure S8. Comparisons of the refined structure and predicted structure by AlphaFold2 (AF) of NR Nups from the *X. laevis* NPC.**



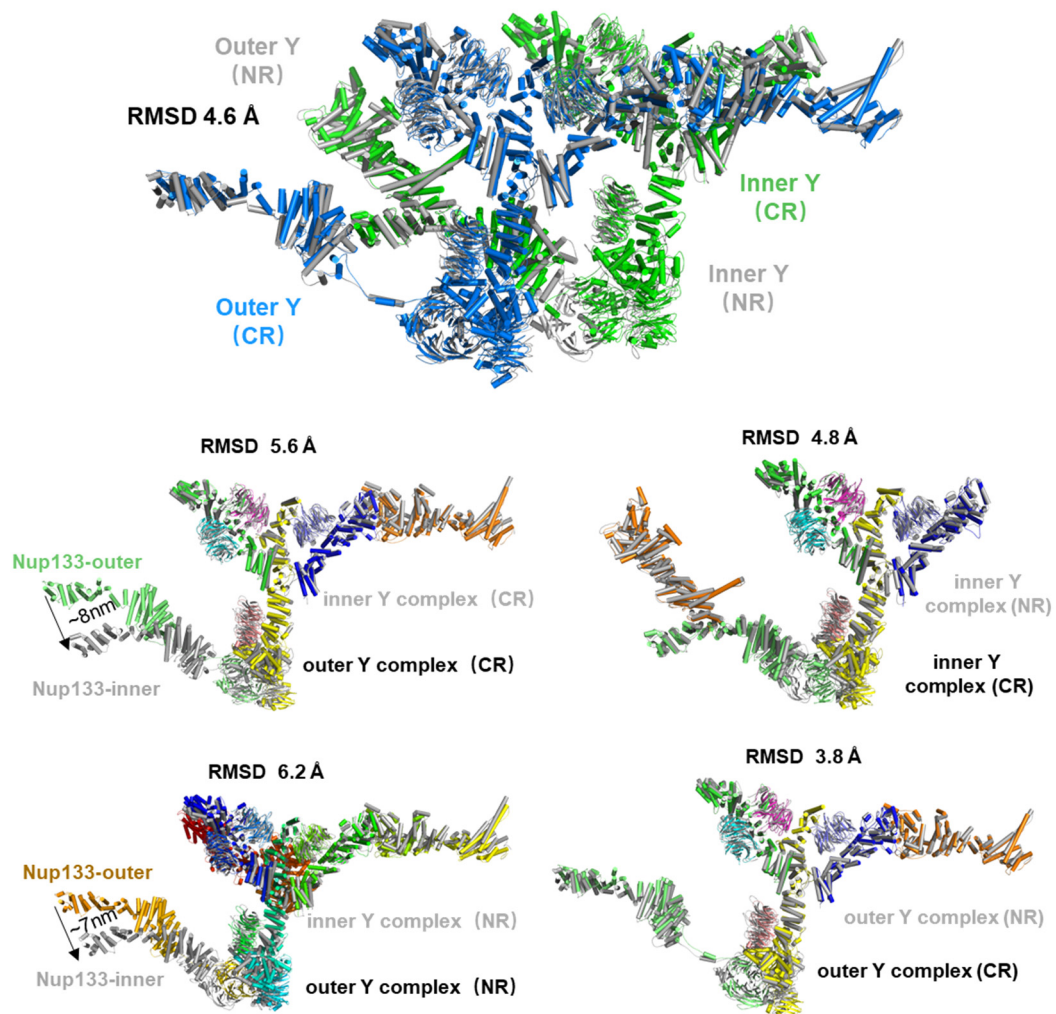

**Figure S9. Structural comparisons of Y-complexes in NR & CR from *X. laevis* NPC.**

A

CR view

CR subunit view

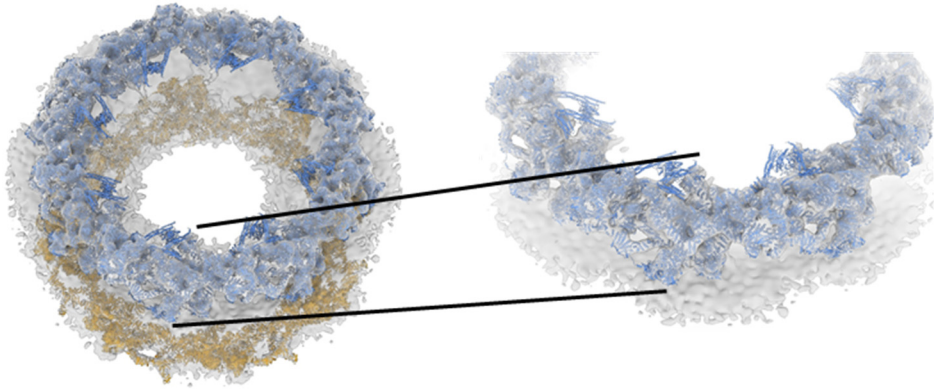

B

NR view

NR subunit view

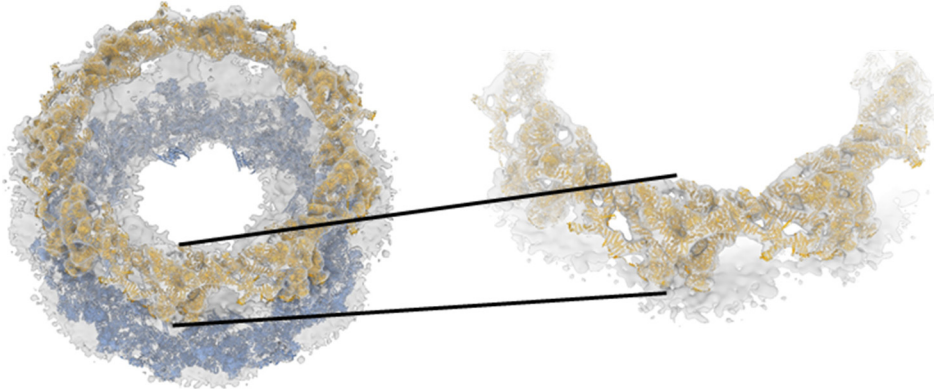

**Figure S10. CR and NR models of *X. laevis* NPC fitted in human NPC map (EMD-3103).**

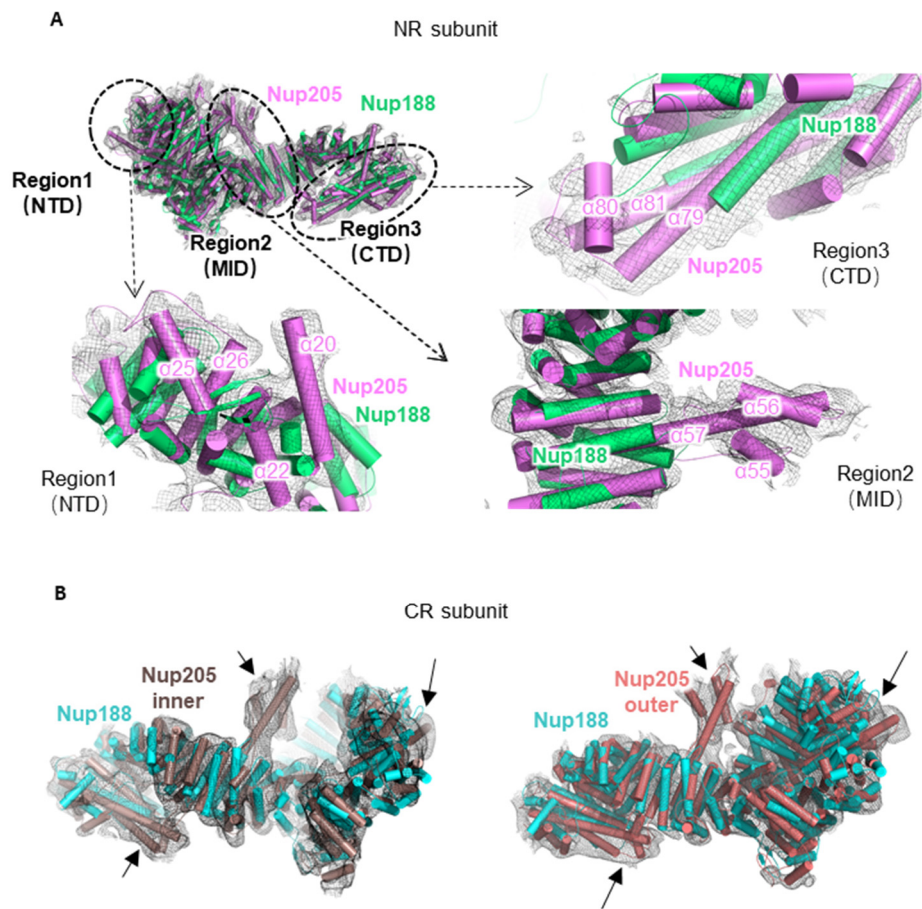

**Figure S11. Nup205, instead of Nup188, is located in NR and CR. (A)** Model comparison of Nup205 and Nup188 onto local densities in NR subunit. Major differences are enlarged and displayed in detail. **(B)** Model comparison of Nup205 and Nup188 onto local densities in CR subunit. The cryo-EM density maps are shown as a black mesh.

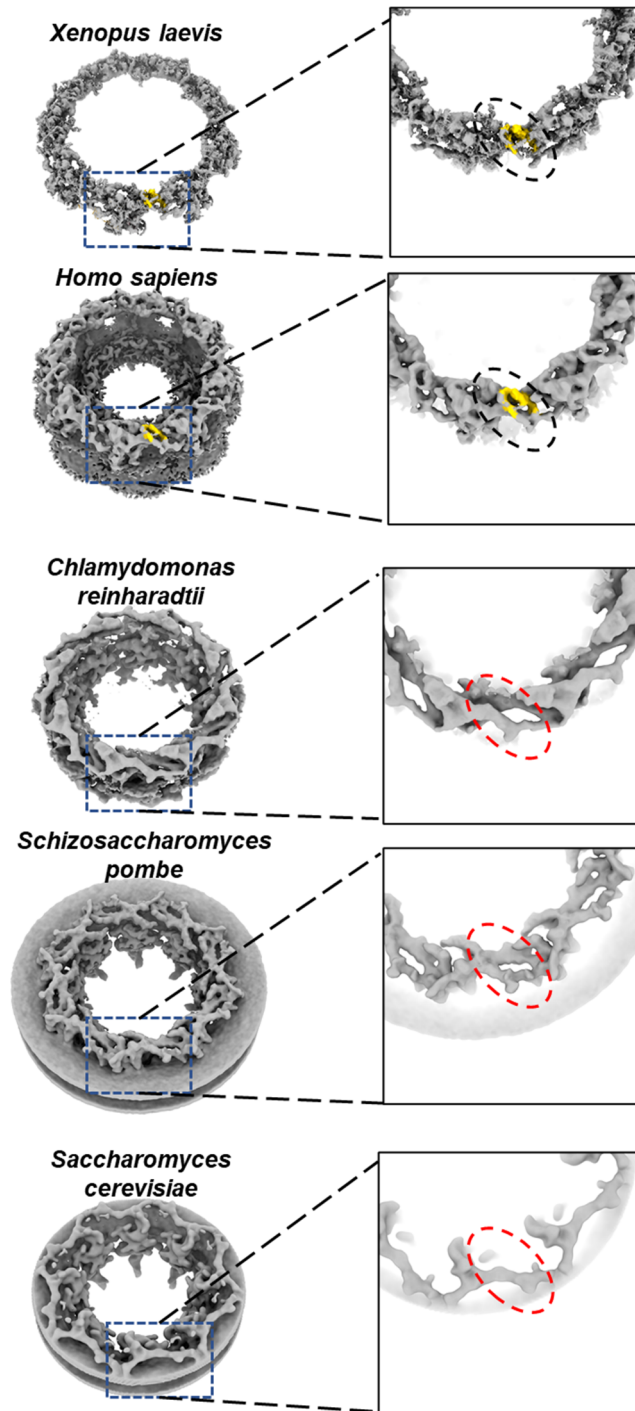

Figure S12. Comparisons of bridge-like densities in the NPC NR for different species.





D

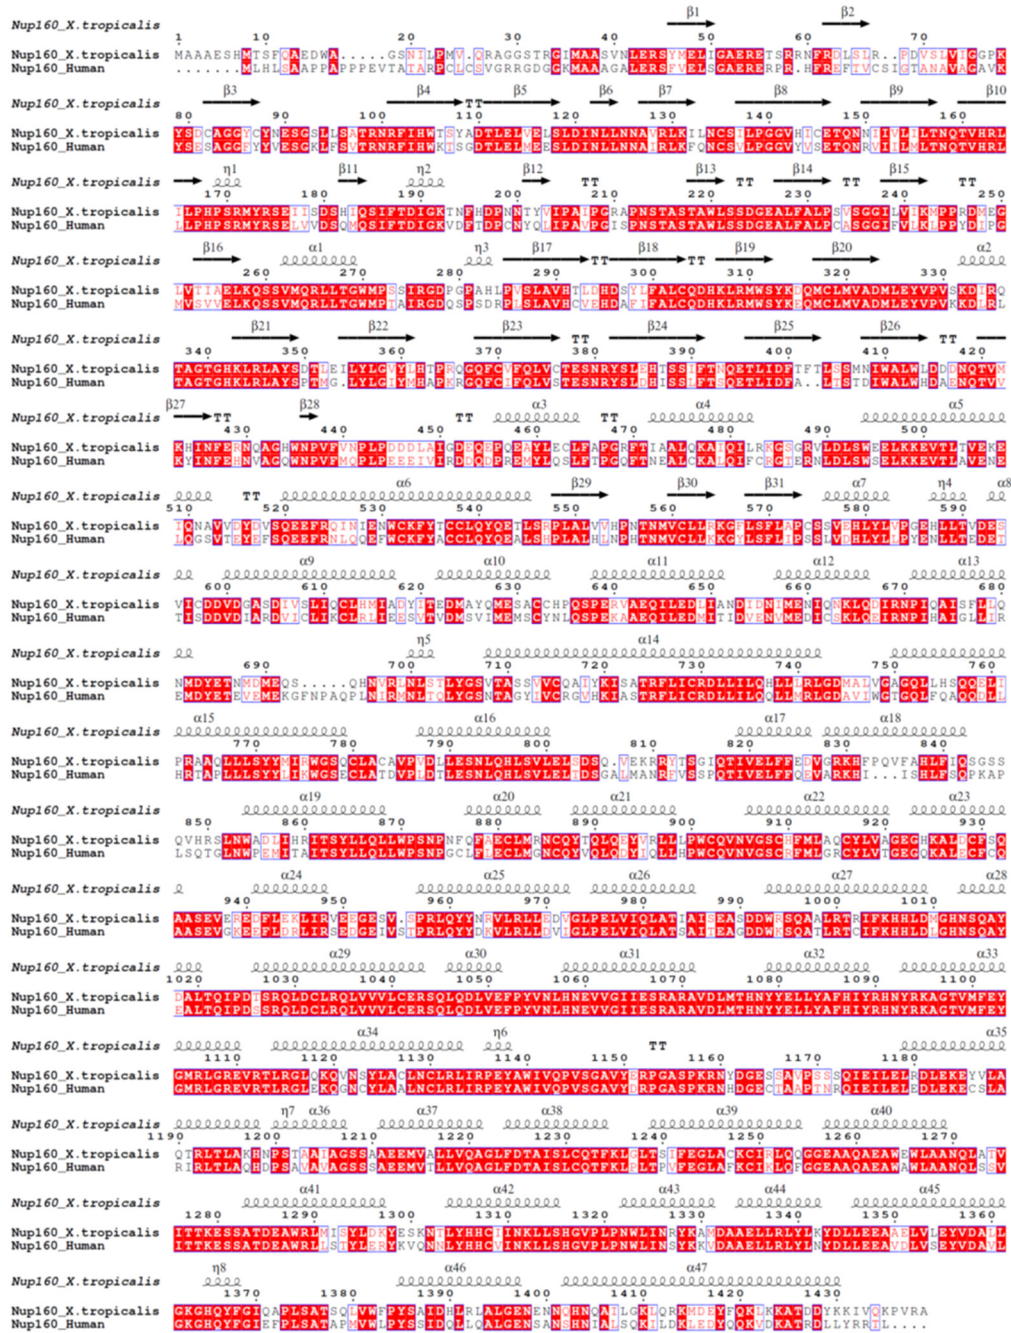









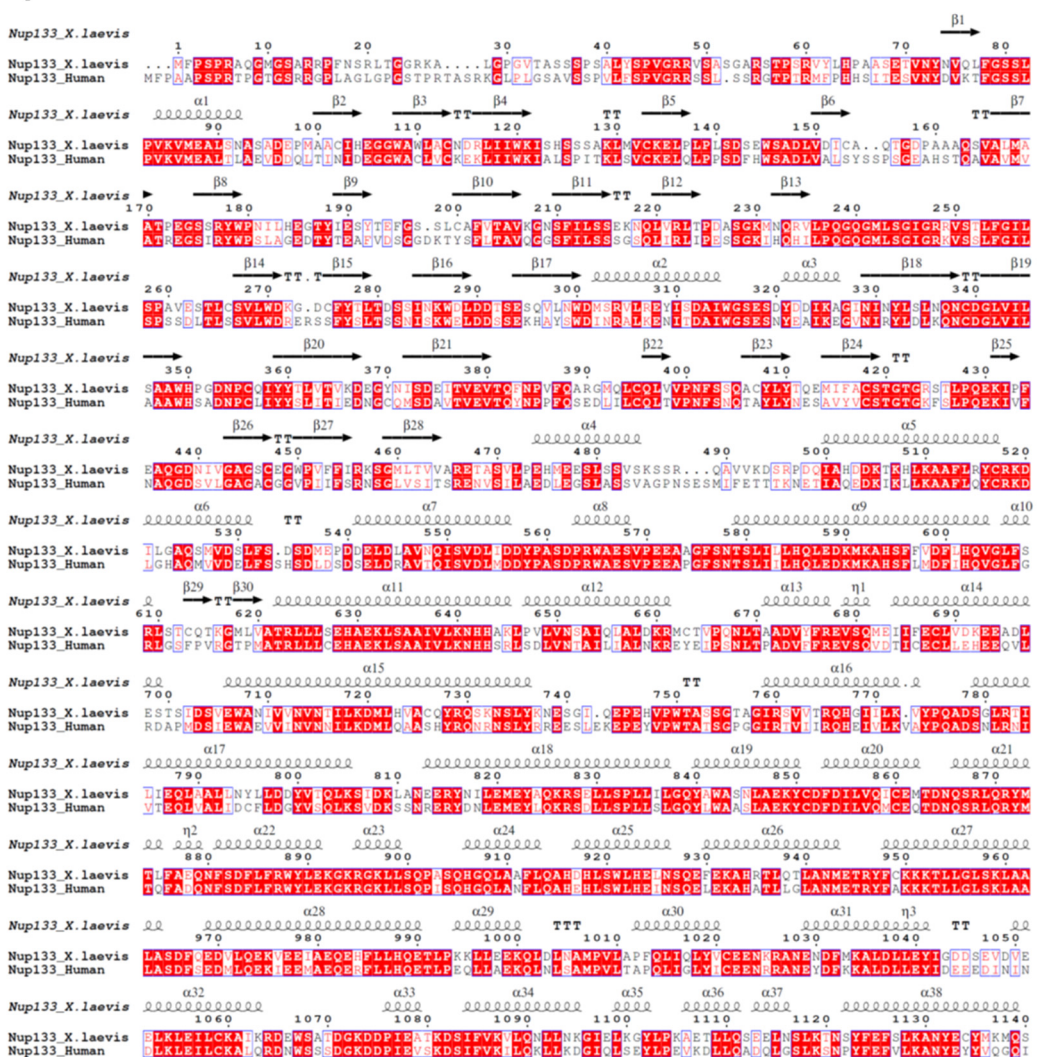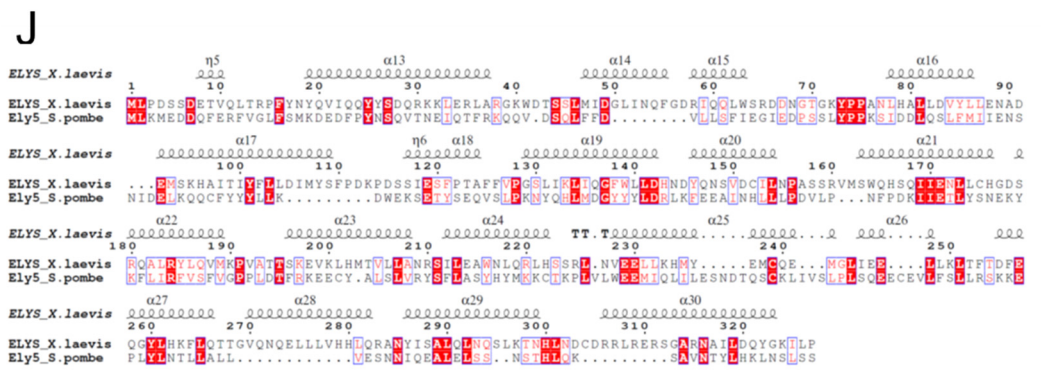





Nup205\_X.laevis  $\alpha 22$   $\eta 4$   $\eta 5$   $\alpha 23$   $\alpha 24$   
 Nup205\_X.laevis I C E L Y K K D P F H L E L A L E Y W C P T E P L Q S S I M G S L C V A H O R P P Q R O V L S K F V R M S D L L P A T T Y P Y L K M L C L A S G P O C A R Y C F S L L  
 Nup205\_Human I C E L Y K K N P F H L E L A L E Y W C P T E P L Q S S I M G S L C V A H O R P P Q R O V L S K F V R M S D L L P A T T Y P Y L K M L C L A S G P O C A R Y C F S L L

Nup205\_X.laevis  $\alpha 25$   $\alpha 26$   
 Nup205\_X.laevis K N G C S S A E N H Q A G G S P V S W E H F F H S L M L Y H E H L R D L F T D N T H C R H P L R G I T O R E D G L I A C L O L I C T T I P W S E A R I A L C E H A Q  
 Nup205\_Human K N G C S S A E N H Q A G G S P V S W E H F F H S L M L Y H E H L R D L F T D N T H C R H P L R G I T O R E D G L I A C L O L I C T T I P W S E A R I A L C E H A Q

Nup205\_X.laevis  $\alpha 28$   $\alpha 29$   $\alpha 30$   $\alpha 31$   $\alpha 32$   
 Nup205\_X.laevis W P V V V I L G L L Q C S I P P L K A E L L K T L A A F C K S P E I A A S I W O S L E Y T Q I L O T V R T G T R C A C I E V E L N E I E S R C E Y P L T R A P C O L I S  
 Nup205\_Human W P V V V I L G L L Q C S I P P L K A E L L K T L A A F C K S P E I A A S I W O S L E Y T Q I L O T V R T G T R C A C I E V E L N E I E S R C E Y P L T R A P C O L I S

Nup205\_X.laevis  $\alpha 33$   $\eta 7$   $\alpha 34$   $\eta 8$   $\beta 3$   $\beta 4$   
 Nup205\_X.laevis T L V E S S F P N L G A G L R P G F P Y L O P L R D V F L R Y R T R A Y R R A A E K W E V A E V L V F Y K L L D Y E P C E D F V D C V E L Q G E E R V A R K P P  
 Nup205\_Human T L V E S S F P N L G A G L R P G F P Y L O P L R D V F L R Y R T R A Y R R A A E K W E V A E V L V F Y K L L D Y E P C E D F V D C V E L Q G E E R V A R K P P

Nup205\_X.laevis  $\alpha 35$   $\alpha 36$   $\alpha 37$   $\alpha 38$   
 Nup205\_X.laevis G F S L M H L L N E S P M L E T C L S L E E G V Q L D T Y A P F P G K K H L E K A V A Y C F L L N L T L Q K E N F M D L L R E S L S I V P L E Q L L Q G I N P R S  
 Nup205\_Human G F S L M H L L N E S P M L E T C L S L E E G V Q L D T Y A P F P G K K H L E K A V A Y C F L L N L T L Q K E N F M D L L R E S L S I V P L E Q L L Q G I N P R S

Nup205\_X.laevis  $\alpha 39$   $\alpha 40$   $\alpha 41$   $\alpha 42$   
 Nup205\_X.laevis K K A D N V V N I A R Y L R H G N S N A E L A F E S A K I L C I S C N S K I Q K I V G D F T Q D N T S Q K L M G F V S C L D E R A E R P L D S K E A D D V K Q T N I  
 Nup205\_Human K K A D N V V N I A R Y L R H G N S N A E L A F E S A K I L C I S C N S K I Q K I V G D F T Q D N T S Q K L M G F V S C L D E R A E R P L D S K E A D D V K Q T N I

Nup205\_X.laevis  $\alpha 43$   $\alpha 44$   $\alpha 45$   $\alpha 46$   $\alpha 47$   $\alpha 48$   
 Nup205\_X.laevis R Y M R I H I N L L I T S L E M K A P N L A M F L L G E L K K P V S T N L O D P G V L G C P R T C L R S I L I L K C T V R A G P V A V W T I H L A E L C Y Q V I Y  
 Nup205\_Human R Y M R I H I N L L I T S L E M K A P N L A M F L L G E L K K P V S T N L O D P G V L G C P R T C L R S I L I L K C T V R A G P V A V W T I H L A E L C Y Q V I Y

Nup205\_X.laevis  $\alpha 49$   $\alpha 50$   $\alpha 51$   $\alpha 52$   
 Nup205\_X.laevis Q L C A C D T S C P T M R Y L R T S O D F L F S O L Q L P F S V E S E I S A N Q M S W L M K T A I E L R T S L N R R S H T Q R L L L L L D D M P P P Y S D C E  
 Nup205\_Human Q L C A C D T S C P T M R Y L R T S O D F L F S O L Q L P F S V E S E I S A N Q M S W L M K T A I E L R T S L N R R S H T Q R L L L L L D D M P P P Y S D C E

Nup205\_X.laevis  $\alpha 53$   $\alpha 54$   $\alpha 55$   $\beta 5$   $\beta 6$   $\alpha 56$   
 Nup205\_X.laevis G C E D E R S V S G F L H F D T A K V R R K I L L D S I F S E I P E L Q L D F P D R Q I E O V I A N C E H K N R G Q T V C N V K L L H R V L V A E V N A L O C  
 Nup205\_Human G C E D E R S V S G F L H F D T A K V R R K I L L D S I F S E I P E L Q L D F P D R Q I E O V I A N C E H K N R G Q T V C N V K L L H R V L V A E V N A L O C

Nup205\_X.laevis  $\alpha 57$   $\eta 9$   $\alpha 58$   
 Nup205\_X.laevis M A A I G O R P L M B E I S L Q Y V V R N K L L O C L H A R R H A L E S W R O L V E I L T A C P O D L I P T S H R O L I R D L O D H R K I L D D A A Q E L M P I  
 Nup205\_Human M A A I G O R P L M B E I S L Q Y V V R N K L L O C L H A R R H A L E S W R O L V E I L T A C P O D L I P T S H R O L I R D L O D H R K I L D D A A Q E L M P I

Nup205\_X.laevis  $\alpha 59$   $\eta 10$   $\alpha 60$   $\alpha 61$   
 Nup205\_X.laevis V A G A V F T L A H L S C V R T E K Q P M T A S C L G Q S C V C M L D G S F A A P P T E N I S G F A S I G D S S L H I T I R L L E P I L K T G G G F Q R V R A H L Y  
 Nup205\_Human V A G A V F T L A H L S C V R T E K Q P M T A S C L G Q S C V C M L D G S F A A P P T E N I S G F A S I G D S S L H I T I R L L E P I L K T G G G F Q R V R A H L Y

Nup205\_X.laevis  $\alpha 62$   $\alpha 63$   $\alpha 64$   
 Nup205\_X.laevis G S L L Y L Q I A Q R P D E P D T L E S A H K S M W E R L T A P E D V F S K L Q R N N I S H E S Y C A L M E V V C R D A C D G H I G R M L A L L D R I V S V D R Q Q Q  
 Nup205\_Human G S L L Y L Q I A Q R P D E P D T L E S A H K S M W E R L T A P E D V F S K L Q R N N I S H E S Y C A L M E V V C R D A C D G H I G R M L A L L D R I V S V D R Q Q Q

Nup205\_X.laevis  $\alpha 65$   $\alpha 66$   $\alpha 67$   $\alpha 68$   $\alpha 69$   $\eta 11$   
 Nup205\_X.laevis W L L Y L S N S C Y L K V L V D S L E D D V V L R L L T P O P P L L K A L Y E S K M A F L T R V A R S O G A E L L R S G V I V R L A Q C Q V Y D M R P E T D P H C Q V F  
 Nup205\_Human W L L Y L S N S C Y L K V L V D S L E D D V V L R L L T P O P P L L K A L Y E S K M A F L T R V A R S O G A E L L R S G V I V R L A Q C Q V Y D M R P E T D P H C Q V F

Nup205\_X.laevis  $\alpha 70$   $\alpha 71$   $\alpha 72$   $\alpha 73$   $\alpha 74$   
 Nup205\_X.laevis G M R E T P W F I P A P V R Y R Q I L L P A L O C O I L T S S A Q H L Q A A G Q V L Q F L V A H S D T I Q A I L R S Q S G S G S L Q E L A L L T G I I S K A A L P G V I L  
 Nup205\_Human G M R E T P W F I P A P V R Y R Q I L L P A L O C O I L T S S A Q H L Q A A G Q V L Q F L V A H S D T I Q A I L R S Q S G S G S L Q E L A L L T G I I S K A A L P G V I L

Nup205\_X.laevis  $\alpha 75$   $\alpha 76$   $\alpha 77$   
 Nup205\_X.laevis N E L D T C T N G S M E L O C H I G R F O R Q C L L R F G G S D R L R C L S L Q D D S R I D G V S K K D D E L A M Q Q I C A N V M E Y C O A L M I C N S P S F Q O T  
 Nup205\_Human N E L D T C T N G S M E L O C H I G R F O R Q C L L R F G G S D R L R C L S L Q D D S R I D G V S K K D D E L A M Q Q I C A N V M E Y C O A L M I C N S P S F Q O T

Nup205\_X.laevis  $\alpha 78$   $\alpha 79$   $\eta 12$   
 Nup205\_X.laevis V C L T P S I S E S A S R D C R O D S O V S I P S W R L P S L G V I H L L K O S A N F P F Y Y D H R O S V K L Q N V E L P P D E I K E L C O S E M P V C A D K I S  
 Nup205\_Human V C L T P S I S E S A S R D C R O D S O V S I P S W R L P S L G V I H L L K O S A N F P F Y Y D H R O S V K L Q N V E L P P D E I K E L C O S E M P V C A D K I S

Nup205\_X.laevis  $\alpha 81$   $\eta 13$   
 Nup205\_X.laevis T Q Y C L A R R R L V K I N R A K L L S L C S Y I E T C L I L W R H L E Y L L H C T T D S O D P F S N M T F C N R R R Q D E N T D P N D P R N L R Q N K V  
 Nup205\_Human T A Q Y V L A R R R L V K I N R A K L L S L C S Y I E T C L I L W R H L E Y L L H C M P D S O D P F S N M T F C N R R R Q D E N T D P N D P R N L R Q N K V

Nup205\_X.laevis  $\alpha 82$   $\alpha 83$   $\alpha 84$   
 Nup205\_X.laevis S C Q D D L L R C A N F C E S L O K L L D I E S L Y K V R S R S P I Q A L V R R I R G L L R S R V  
 Nup205\_Human S C Q D D L L R C A N F C E S L O K L L D I E S L Y K V R S R S P I Q A L V R R I R G L L R S R V











**Table S1 Statistics of cryo-SPA data collection and image processing.**

| <b>Data acquisition</b>               |                              |                   |                  |
|---------------------------------------|------------------------------|-------------------|------------------|
| Microscope                            | Titan Krios G2               |                   |                  |
| Voltage (kV)                          | 300                          |                   |                  |
| Detector                              | Gatan K2                     |                   |                  |
| Energy filter                         | Gatan GIF Quantum, 20 eV     |                   |                  |
| Mode                                  | Super resolution             |                   |                  |
| Pixel size (Å)                        | 2.24                         |                   |                  |
| Stage tilting angle                   | 30°/ 45°/ 60°/ 0°(side-view) |                   |                  |
| Exposure per tilt (e/Å <sup>2</sup> ) | 60 / 80/ 100/ 100 (or 120)   |                   |                  |
| Number of images                      | 8745                         |                   |                  |
| Defocus range (µm)                    | -1 ~ -4                      |                   |                  |
| Software                              | SerialEM                     |                   |                  |
| <b>Reconstruction in CR</b>           |                              |                   |                  |
| Software                              | RELION-3.0/CryoSPARC         |                   |                  |
| Data set                              | CR core region               | CR subunit region | CR Nup358 region |
| Final number of particles             | 354460                       | 354460            | 678866           |
| Symmetry                              | C1                           | C1                | C1               |
| Final resolution (Å)                  | 8.0                          | 8.7               | 8.9              |
| Map pixel size (Å)                    | 2.24                         | 2.24              | 2.24             |
| Map sharpening                        |                              |                   |                  |
| B-factor (Å <sup>2</sup> )            | -591                         | -763              | -850             |
| <b>Reconstruction in NR</b>           |                              |                   |                  |
| Software                              | RELION-3.0/CryoSPARC         |                   |                  |
| Data set                              | NR core region               | NR subunit region | NR Nup133 region |
| Final number of particles             | 417490                       | 417490            | 298318           |
| Symmetry                              | C1                           | C1                | C1               |
| Final resolution (Å)                  | 7.8                          | 8.1               | 8.6              |
| Map pixel size (Å)                    | 2.24                         | 2.24              | 2.24             |
| Map sharpening                        |                              |                   |                  |
| B-factor (Å <sup>2</sup> )            | -433                         | -541              | -612             |

**Supplementary Movies.**

**Movie S1. Overall structure of outer rings from the *X. laevis* NPC.**

**Movie S2. Model-map fitting quality of CR Nups from the *X. laevis* NPC.**

**Movie S4. Model-map fitting quality of NR Nups from the *X. laevis* NPC.**

**Movie S4. Structural comparison of Nup93 between the refined model and the model predicted by AlphaFold2.**

**Supplementary Scripts.**

**Script S1. The modified block-based reconstruction script for symmetry expanding of CR and NR asymmetric units.**
